# Supplementary material
Source: MDPI journal article supplement (https://www.mdpi.com/2073-4344/7/7/210)
Supplement: s1 [file s1]

# Supplementary Materials: Solvent-less Coupling of Epoxides and CO<sub>2</sub> in Compressed Medium Catalysed by Fluorinated Metalloporphyrins

Rui M. B. Carrilho <sup>1,2</sup>, Lucas D. Dias <sup>1</sup>, Raquel Rivas <sup>2</sup>, Mariette M. Pereira <sup>1,\*</sup>, Carmen Claver <sup>2,3</sup> and Anna M. Masdeu-Bultó <sup>2,\*</sup>

## 2. Results and Discussion

### 2.2. Coupling Reactions of Cyclohexene Oxide with CO<sub>2</sub>

#### 2.2.5. MALDI-TOF Analysis and Mechanistic Considerations

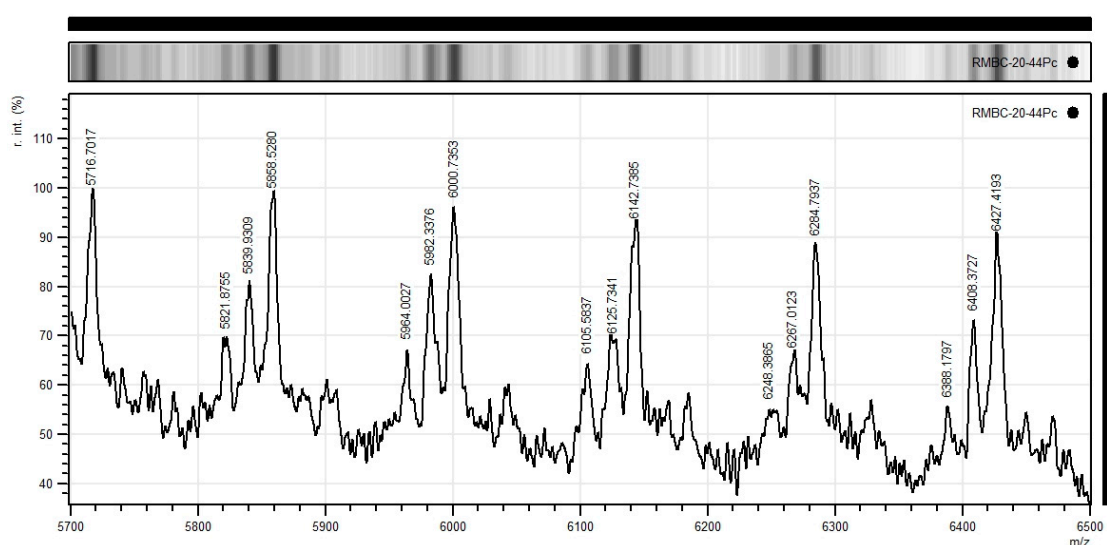

**Figure S1..** MALDI TOF spectra of PCHC obtained under the reaction conditions of Pco<sub>2</sub> = 50 bar, T = 50 °C (entry 1, Table 3)

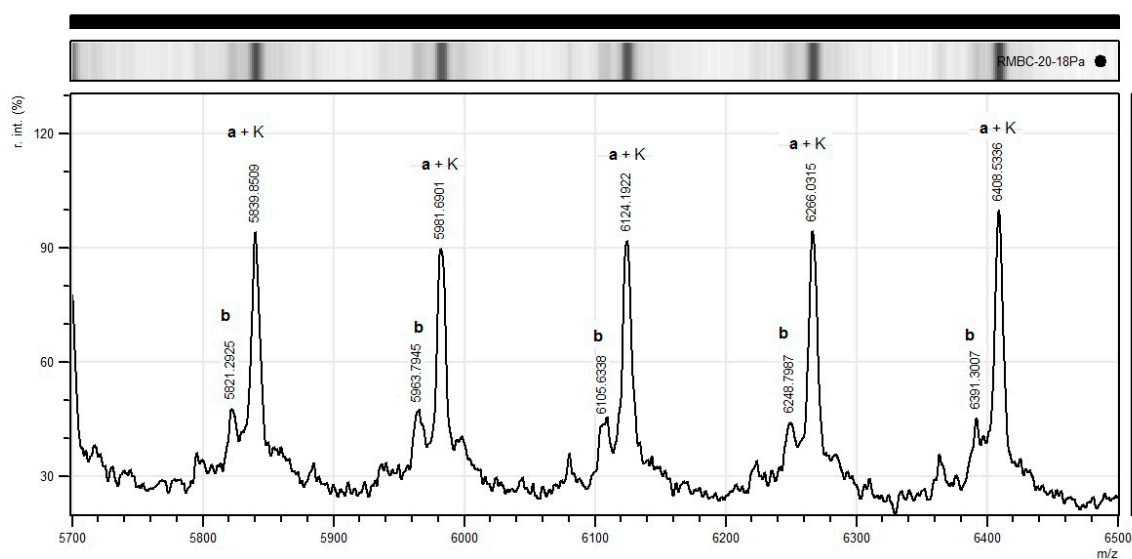

**Figure S2..** MALDI TOF spectra of PCHC obtained under the reaction conditions of Pco<sub>2</sub> = 50 bar, T = 80 °C (entry 2, Table 3)

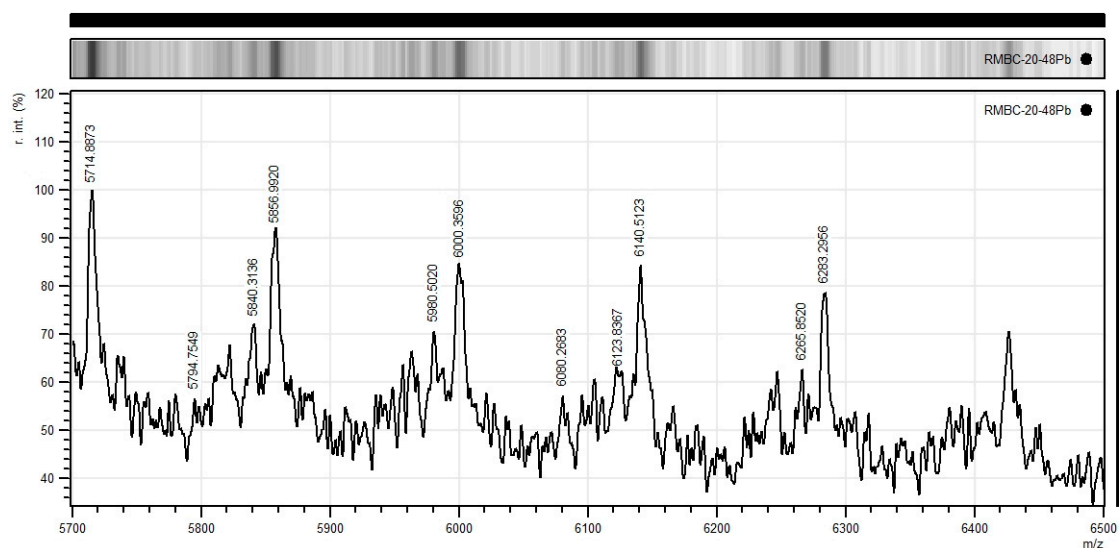

**Figure S3..** MALDI TOF spectra of PCHC obtained under the reaction conditions of  $P_{CO_2} = 10$  bar,  $T = 80$  °C (entry 3, Table 3)

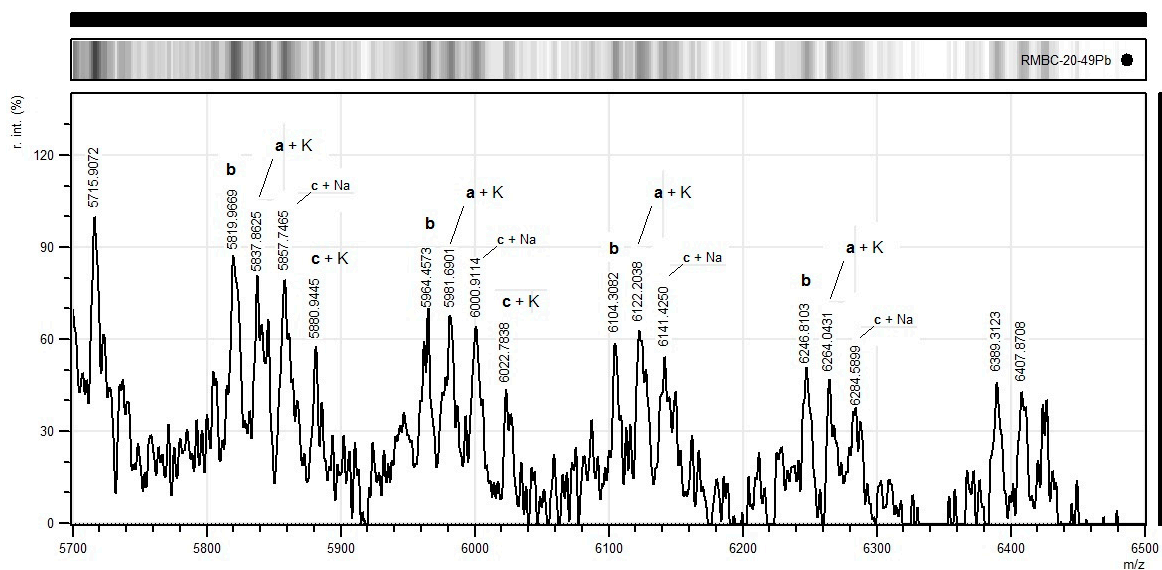

**Figure S4..** MALDI TOF spectra of PCHC obtained under the reaction conditions of  $P_{CO_2} = 70$  bar,  $T = 80$  °C (entry 4, Table 3).

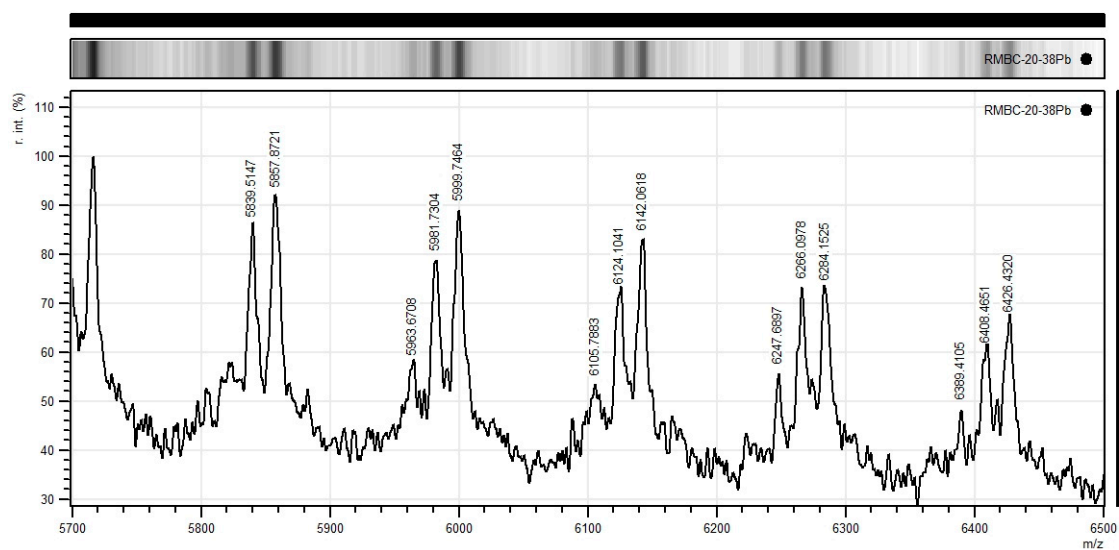

**Figure S5..** MALDI TOF spectra of PCHC obtained under the reaction conditions of  $P_{CO_2} = 110$  bar,  $T = 80$  °C (entry 5, Table 3)

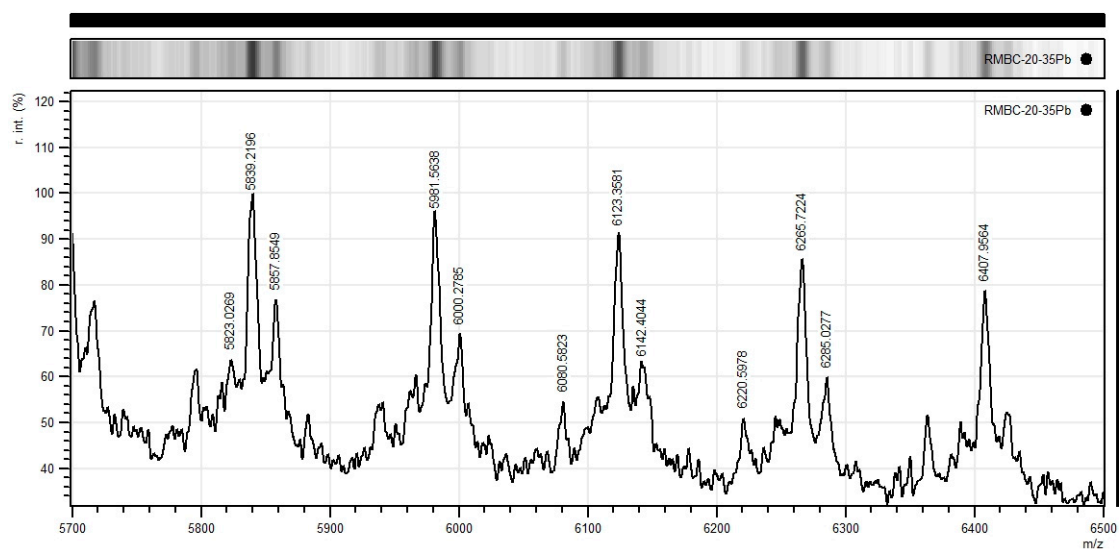

**Figure S6..** MALDI TOF spectra of PCHC obtained under the reaction conditions of  $P_{CO_2} = 150$  bar,  $T = 80$  °C (entry 6, Table 3)
